# Supplementary material for: A fast weak motif-finding algorithm based on community detection in graphs
Source: Springer Nature journal article supplement (doi:10.1186/1471-2105-14-227), 2013-07-17
Supplement: 12859_2012_5988_MOESM3_ESM.pdf [file 12859_2012_5988_MOESM3_ESM.pdf]

| TF(#)    | $(l, d)$ - $x$ | Logo                                                                                | Consensus                | Rank & Lit. |
|----------|----------------|-------------------------------------------------------------------------------------|--------------------------|-------------|
| LexA(10) | (16, 6)-7      |     | CTGTATATACACACAG         | 1 [21] [30] |
| Lrp(58)  | (13, 4)-5      |    | AGAATTTTATTCT            | 1 [30] [43] |
| MalT(9)  | (10, 3)-3      |    | CTCCTCCCC                | 1 [30] [44] |
| MarA(10) | (23, 8)-11     |    | ACTATATTCATTATCGTTTTTCAT | 1 [45]      |
| MelR(6)  | (13, 3)-5      |    | TCAGCTTTTCTGCTGATT       | 1 *         |
| Mlc(7)   | (18, 6)-8      |    | TCAGCTTTTCTGCTGATT       | 3 [46]      |
| ModE(6)  | (23, 8)-12     |    | CGCTATATAAATGCCTATATAAC  | 1 [30] [47] |
| Nac(9)   | (17, 5)-8      |    | ACACATGCAATAAACA         | 1 [30]      |
| NagC(6)  | (18, 6)-9      |    | TAATTTTCTGCAAATCAA       | 1 [30]      |
| NarL(42) | (21, 8)-10     |    | AGGTAAAAATTTTAATAATTT    | 1 *         |
| NtrC(9)  | (19, 7)-8      |    | TGCACCAGAATGGTGCATC      | 2 [30] [48] |
| OmpR(15) | (22, 7)-10     |   | TTTTACATTTGGTTACATATTT   | 1 [30] [38] |
| PhoB(15) | (21, 8)-11     |  | CTGTCATATATCTGTCATATT    | 3 [30] [33] |
| PurR(15) | (16, 5)-7      |  | CGCAAACGTTTTTCGTT        | 1 [30] [49] |
| SoxS(17) | (20, 8)-11     |  | ATTTGATCGTTTTGTGCCTTA    | 1 *         |
| TyrR(17) | (22, 8)-10     |  | TAAGTGTAATTAATATTTACA    | 1 [30] [38] |
