# Supplementary material for: A fast weak motif-finding algorithm based on community detection in graphs
Source: Springer Nature journal article supplement (doi:10.1186/1471-2105-14-227), 2013-07-17

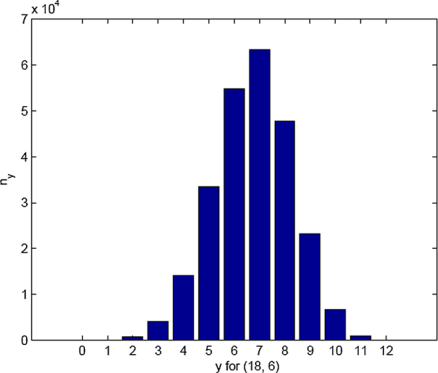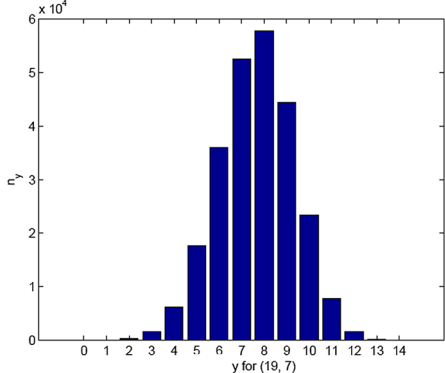

Supplement: 12859_2012_5988_MOESM6_ESM.pdf [file 12859_2012_5988_MOESM6_ESM.pdf]
